# Supplementary material for: Benzoquinolateplatinum(ii) complexes as building blocks in the synthesis of Pt–Ag extended structures
Source: Royal Society of Chemistry journal article supplement (doi:10.1039/c2dt11885h), 2012-01-01
Supplement: c2dt11885h.pdf [file c2dt11885h.pdf]

## **Benzoquinolateplatinum(II) Complexes as Building Blocks in the Synthesis of Pt–Ag Donor-Acceptor Extended Structures**

Juan Forniés,<sup>a</sup> Susana Ibáñez,<sup>a</sup> Elena Lalinde,<sup>\*b</sup> Antonio Martín,<sup>\*a</sup> M. Teresa Moreno.<sup>b</sup>  
and Athanassios C. Tsipis<sup>\*c</sup>

<sup>a</sup> *Departamento de Química Inorgánica - Instituto de Síntesis Química y Catálisis Homógena. Universidad de Zaragoza - C.S.I.C. 50009 Zaragoza, Spain*

<sup>b</sup> *Departamento de Química - Grupo de Síntesis Química de La Rioja, UA – C.S.I.C. Universidad de La Rioja, 26006, Logroño, Spain*

<sup>c</sup> *Laboratory of Inorganic and General Chemistry, Department of Chemistry, University of Ioannina, 451 10 Ioannina, Greece and Departamento de Química Inorgánica - Instituto de Ciencia de Materiales de Aragón. Universidad de Zaragoza - C.S.I.C. 50009 Zaragoza, Spain (on Sabbatical leave)*

## Table of Contents

|                                                                                                                                                                                                                                                                                                                            |           |                |
|----------------------------------------------------------------------------------------------------------------------------------------------------------------------------------------------------------------------------------------------------------------------------------------------------------------------------|-----------|----------------|
| <b>Complete author's list of reference</b>                                                                                                                                                                                                                                                                                 | <b>94</b> | <b>S3</b>      |
| <b>Figures S1.</b> View of the molecular structure of [Pt(bzq)(C <sub>6</sub> F <sub>5</sub> )py] ( <b>5</b> )                                                                                                                                                                                                             |           | <b>S4</b>      |
| <b>Figures S2.</b> View of the molecular structure of [{Pt(bzq)(C <sub>6</sub> F <sub>5</sub> ) <sub>2</sub> }Ag(PPh <sub>3</sub> )] ( <b>3</b> )                                                                                                                                                                          |           | <b>S4</b>      |
| <b>Figure S3.</b> Normalized absorption spectra calculated from their reflectance diffuse spectra of <b>1</b> , <b>2</b> and <b>4</b> in solid state                                                                                                                                                                       |           | <b>S5</b>      |
| <b>Figure S4.</b> Optimized geometries along with selected structural parameters of <b>1</b> ( <b>a</b> ), <b>2</b> ( <b>b</b> ), <b>3</b> ( <b>c</b> ) and <b>4'</b> ( <b>d</b> ) computed at the PBE1PBE/Def2-TZVP(M)U6-31+G(d,p)(X) level (numbers in bold refer to structural parameters of the T <sub>1</sub> state). |           | <b>S6</b>      |
| <b>Figures S5-S8</b> Molecular orbitals involved in the electronic transitions observed in the absorption spectra of <b>1-3</b> and <b>4'</b> calculated at the PBE1PBE/Def2-TZVP(M)U6-31+G(d,p)(X) level of theory                                                                                                        |           | <b>S7-S10</b>  |
| <b>Figure S9.</b> Electron density difference maps corresponding to electronic transitions in the absorption spectra of DCSs <b>1-3</b> and <b>4'</b> , along with the respective % percentage changes in the group charge density (negative sign means % charge depletion)                                                |           | <b>S11</b>     |
| <b>X-ray structure determination details for 3 and 5</b>                                                                                                                                                                                                                                                                   |           | <b>S12</b>     |
| <b>Table S1.</b> Crystal data and structure refinement for complexes [{Pt(bzq)(C <sub>6</sub> F <sub>5</sub> ) <sub>2</sub> }Ag(PPh <sub>3</sub> )]·3CH <sub>2</sub> Cl <sub>2</sub> ( <b>3</b> ·3CH <sub>2</sub> Cl <sub>2</sub> ) and [Pt(bzq)(C <sub>6</sub> F <sub>5</sub> )py] ( <b>5</b> )                           |           | <b>S13</b>     |
| <b>Tables S2-S3.</b> Selected bond lengths (Å) and angles (°) for complexes [Pt(bzq)(C <sub>6</sub> F <sub>5</sub> )py] ( <b>5</b> ) and [{Pt(bzq)(C <sub>6</sub> F <sub>5</sub> ) <sub>2</sub> }Ag(PPh <sub>3</sub> )]·3CH <sub>2</sub> Cl <sub>2</sub> ( <b>3</b> ·3CH <sub>2</sub> Cl <sub>2</sub> )                    |           | <b>S14</b>     |
| <b>Tables S4-S5.</b> Selected principal singlet-singlet optical transitions in the absorption spectra of complexes <b>1-3</b> and <b>4'</b> in the gas phase calculated at the TD-DFT                                                                                                                                      |           | <b>S15-S18</b> |
| <b>Table S6-S9.</b> Partial molecular orbital compositions of 1-4 calculated by TD-DFT calculation                                                                                                                                                                                                                         |           | <b>S19-S22</b> |
| <b>Table S10.</b> Cartesian Coordinates of the Stationary Points on the PES of <b>1-3</b> and <b>4'</b> in their S <sub>0</sub> and T <sub>1</sub> states                                                                                                                                                                  |           | <b>S23</b>     |
| <b>Table S11.</b> Energetic Results                                                                                                                                                                                                                                                                                        |           | <b>S34</b>     |

**List of authors in Ref. 94**

Frisch, M. J.; Schlegel, H. B.; Scuseria, G. E.; Robb, M. A.; Cheeseman, J. R.; Zakrzewski, V. G.; Montgomery, J. A.; Vreven, T.; Kudin, K. N.; Burant, J. C.; Millan, J. M.; Iyengar, S. S.; Tomasi, J.; Barone, V.; Mennucci, B.; Cossi, M.; Scalmani, G.; Rega, N.; Petersson, G. A.; Nakatsuji, H.; Hada, M.; Ehara, M.; Toyota, K.; Fukuda, R.; Hasegawa, J.; Ishida, M.; Nakajima, T.; Honda, Y.; Kitao, O.; Nakai, H.; Klene, M.; Li, X.; Knox, J. E.; Hratchian, H. P.; Cross, J. B.; Adamo, C.; Jaramillo, J.; Gomperts, R.; Stratmann, R. E.; Yazyev, O.; Austin, A. J.; Cammi, R.; Pomelli, C.; Ochterski, J. W.; Ayala, P. Y.; Morokuma, K.; Voth, G. A.; Salvador, P.; Dannenberg, J. J.; Zakrzewski, V. G.; Dapprich, S.; Daniels, A. D.; Strain, M. C.; Farkas, O.; Malick, D. K.; Rabuck, A. D.; Raghavachari, K.; Foresman, J. B.; Ortiz, J. V.; Cui, Q.; Baboul, A. G.; Clifford, S.; Cioslowski, J.; Stefanov, B. B.; Liu, G.; Liashenko, A.; Piskorz, P.; Komaromi, I.; Martin, R. L.; Fox, D. J.; Keith, T.; Al-Laham, M. A.; Peng, C. Y.; Nanayakkara, A.; Challacombe, M.; Gill, P. M. W.; Johnson, B.; Chen, W.; Wong, M. W.; Gonzalez, C.; Pople, J. A.

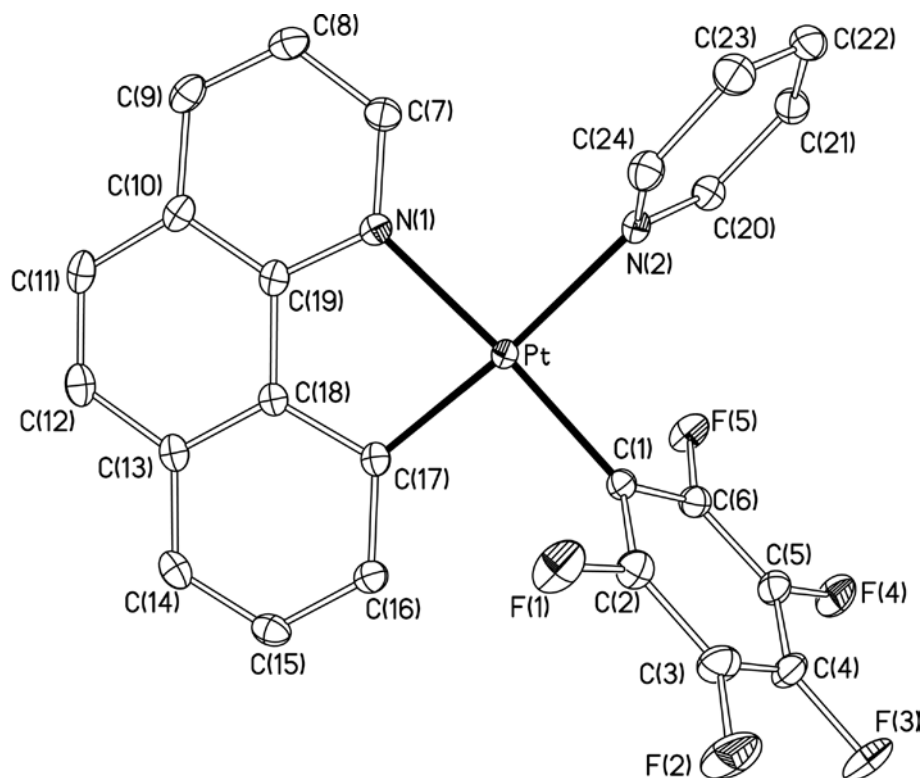

**Figure S1.** View of the molecular structure of [Pt(bzq)(C<sub>6</sub>F<sub>5</sub>)py] (**5**)

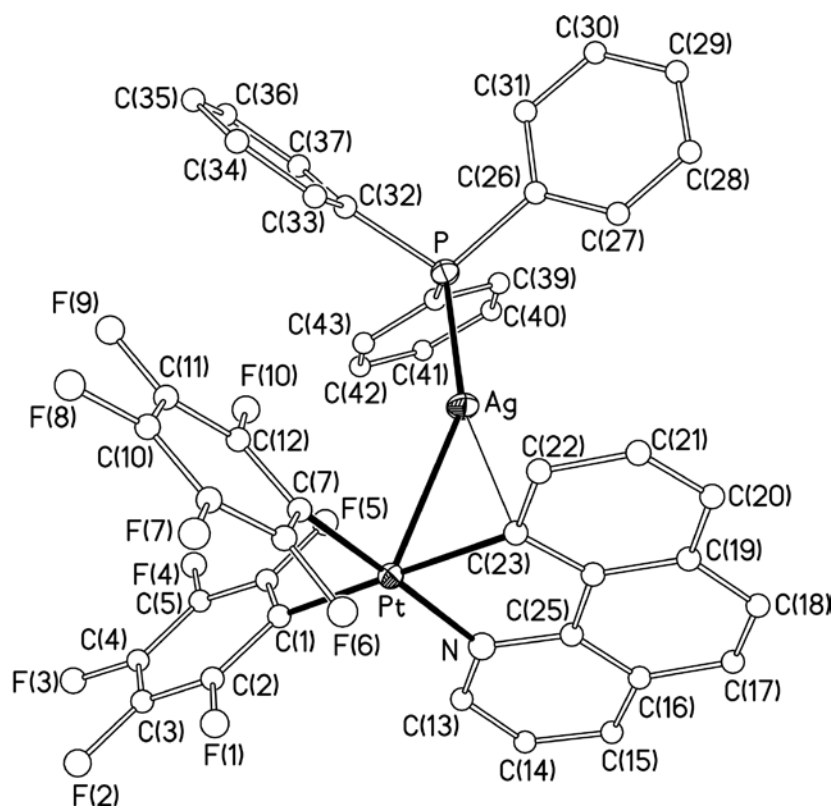

**Figure S2.** View of the molecular structure of [{Pt(bzq)(C<sub>6</sub>F<sub>5</sub>)<sub>2</sub>}Ag(PPh<sub>3</sub>)] (**3**)

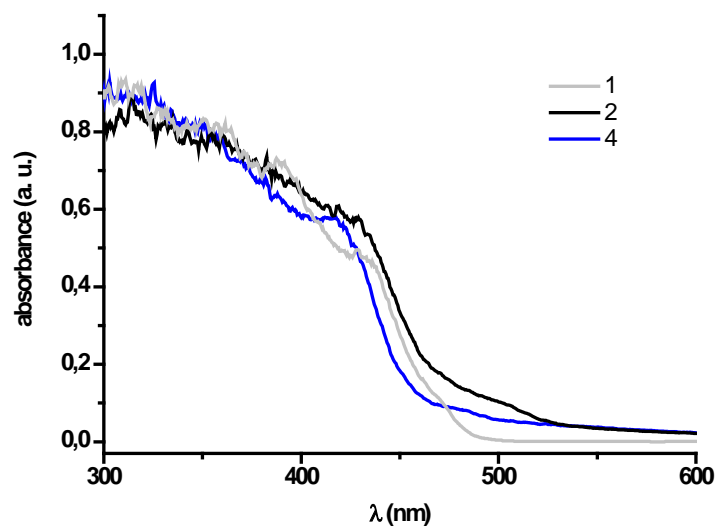

**Figure S3.** Normalized absorption spectra calculated from their reflectance diffuse spectra of **1**, **2** and **4** in solid state

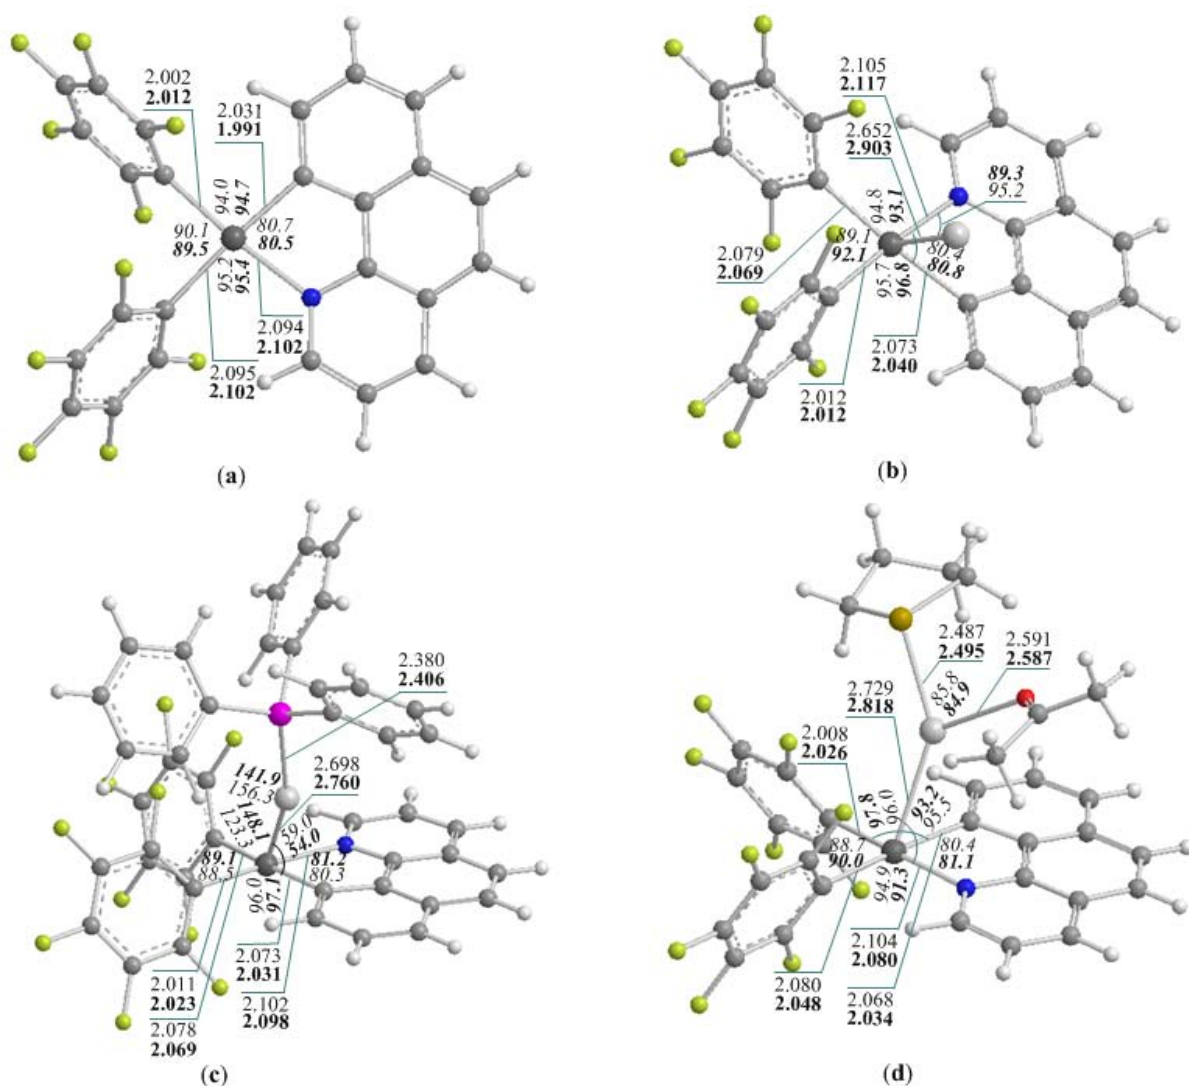

**Figure S4.** Optimized geometries along with selected structural parameters of **1** (a), **2** (b), **3** (c) and **4'** (d) computed at the PBE1PBE/Def2-TZVP(M)U6-31+G(d,p)(X) level (numbers in bold refer to structural parameters of the  $T_1$  state).

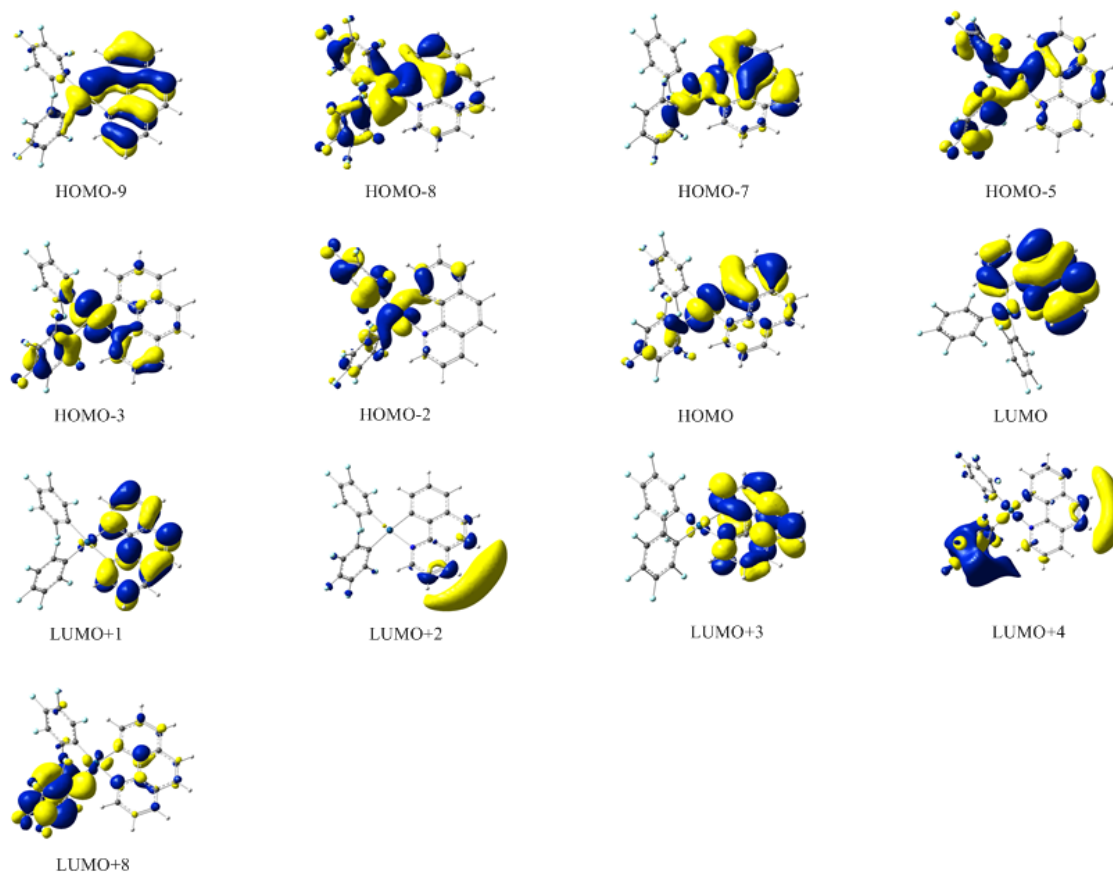

**Figure S5.** Molecular orbitals involved in the electronic transitions observed in the absorption spectrum of **1** calculated at the PBE1PBE/Def2-TZVP(M)U6-31+G(d,p)(X) level of theory.

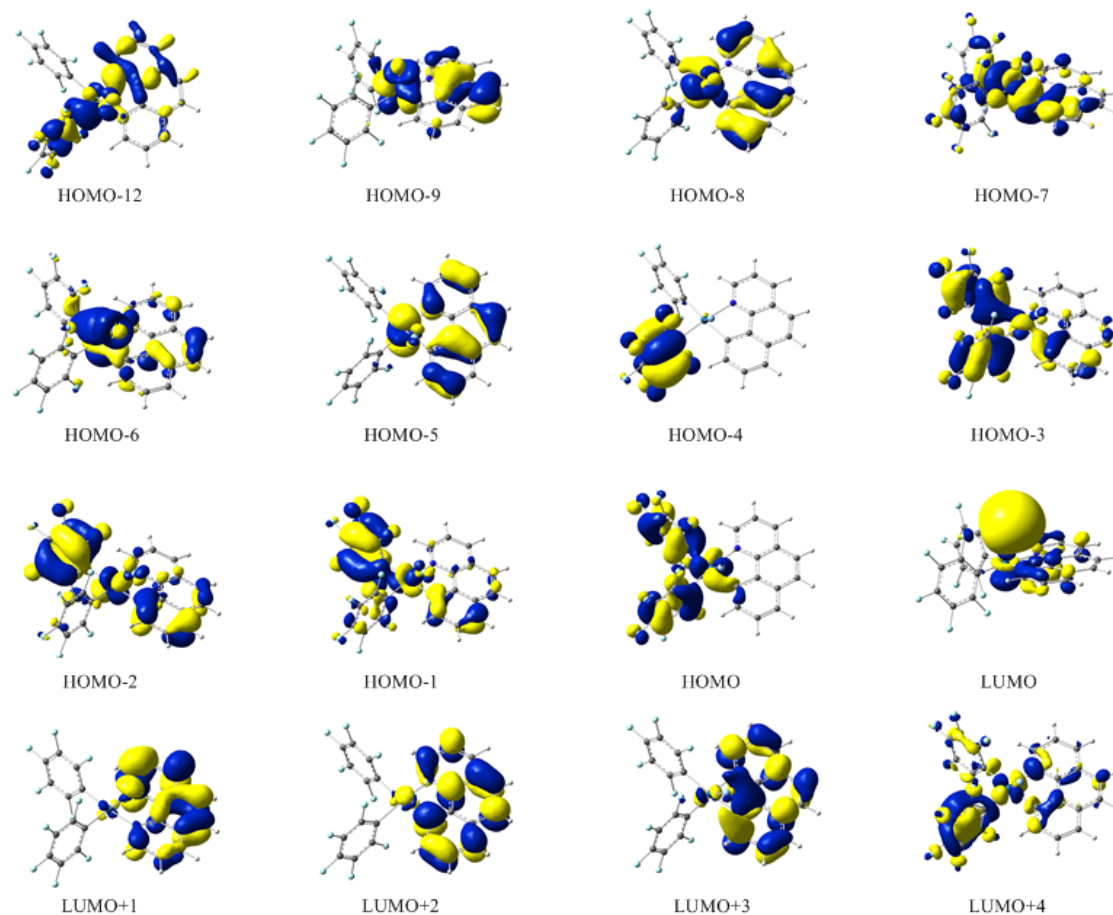

**Figure S6.** Molecular orbitals involved in the electronic transitions observed in the absorption spectrum of **2** calculated at the PBE1PBE/Def2-TZVP(M)U6-31+G(d,p)(X) level of theory.



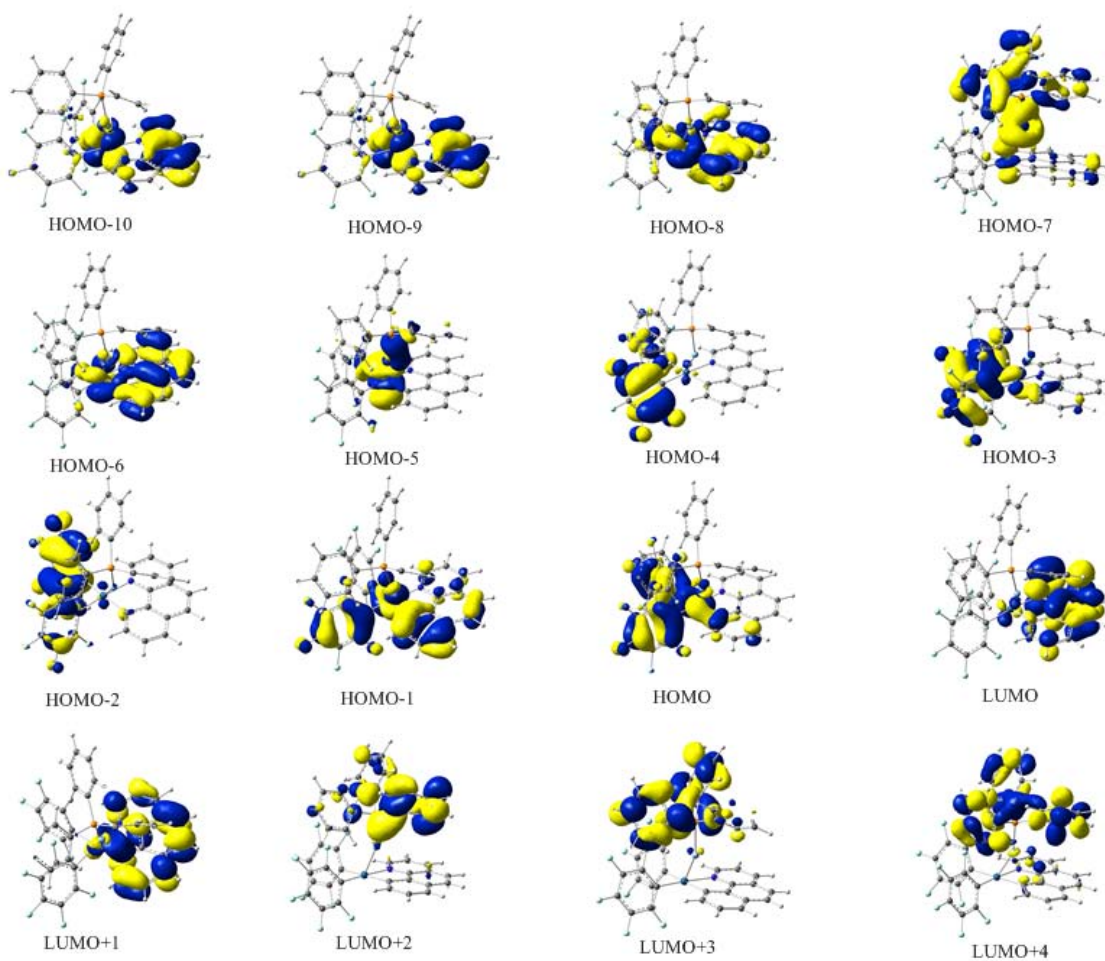

**Figure S7.** Molecular orbitals involved in the electronic transitions observed in the absorption spectrum of **3** calculated at the PBE1PBE/Def2-TZVP(M)U6-31+G(d,p)(X) level of theory.

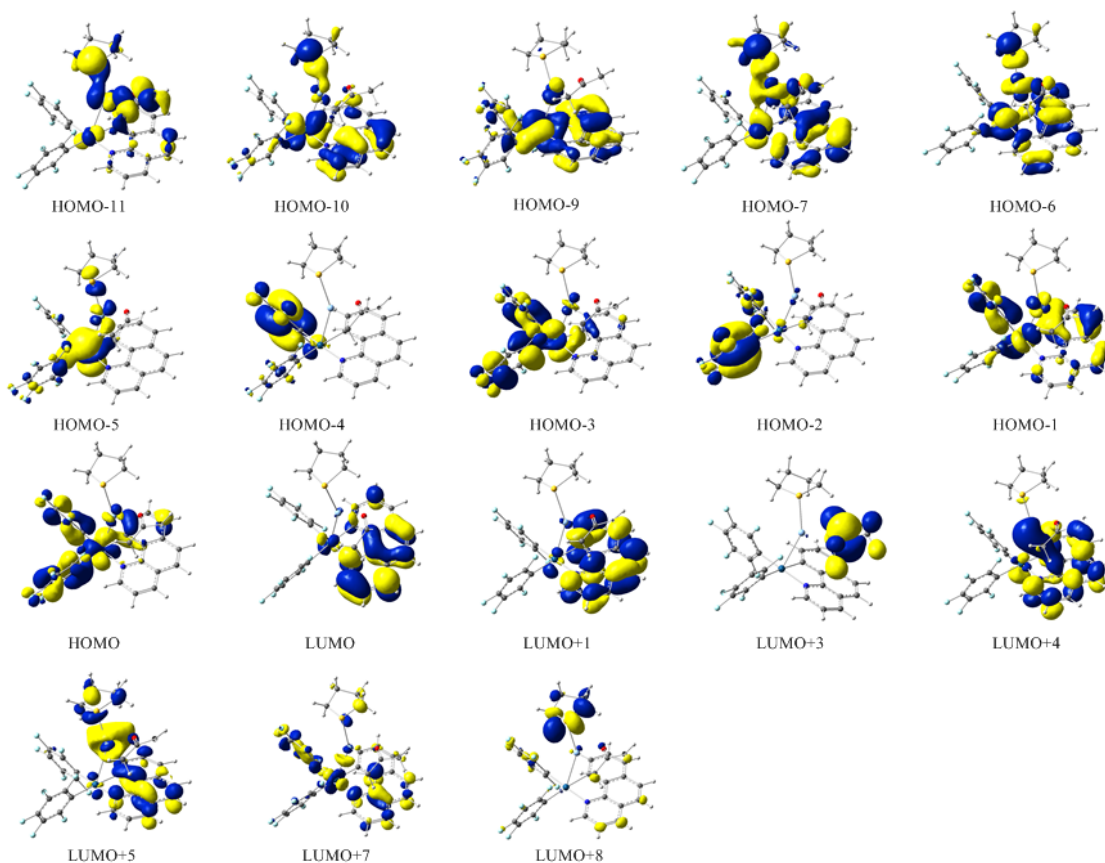

**Figure S8.** Molecular orbitals involved in the electronic transitions observed in the absorption spectrum of **4'** calculated at the PBE1PBE/Def2-TZVP(M)U6-31+G(d,p)(X) level of theory.

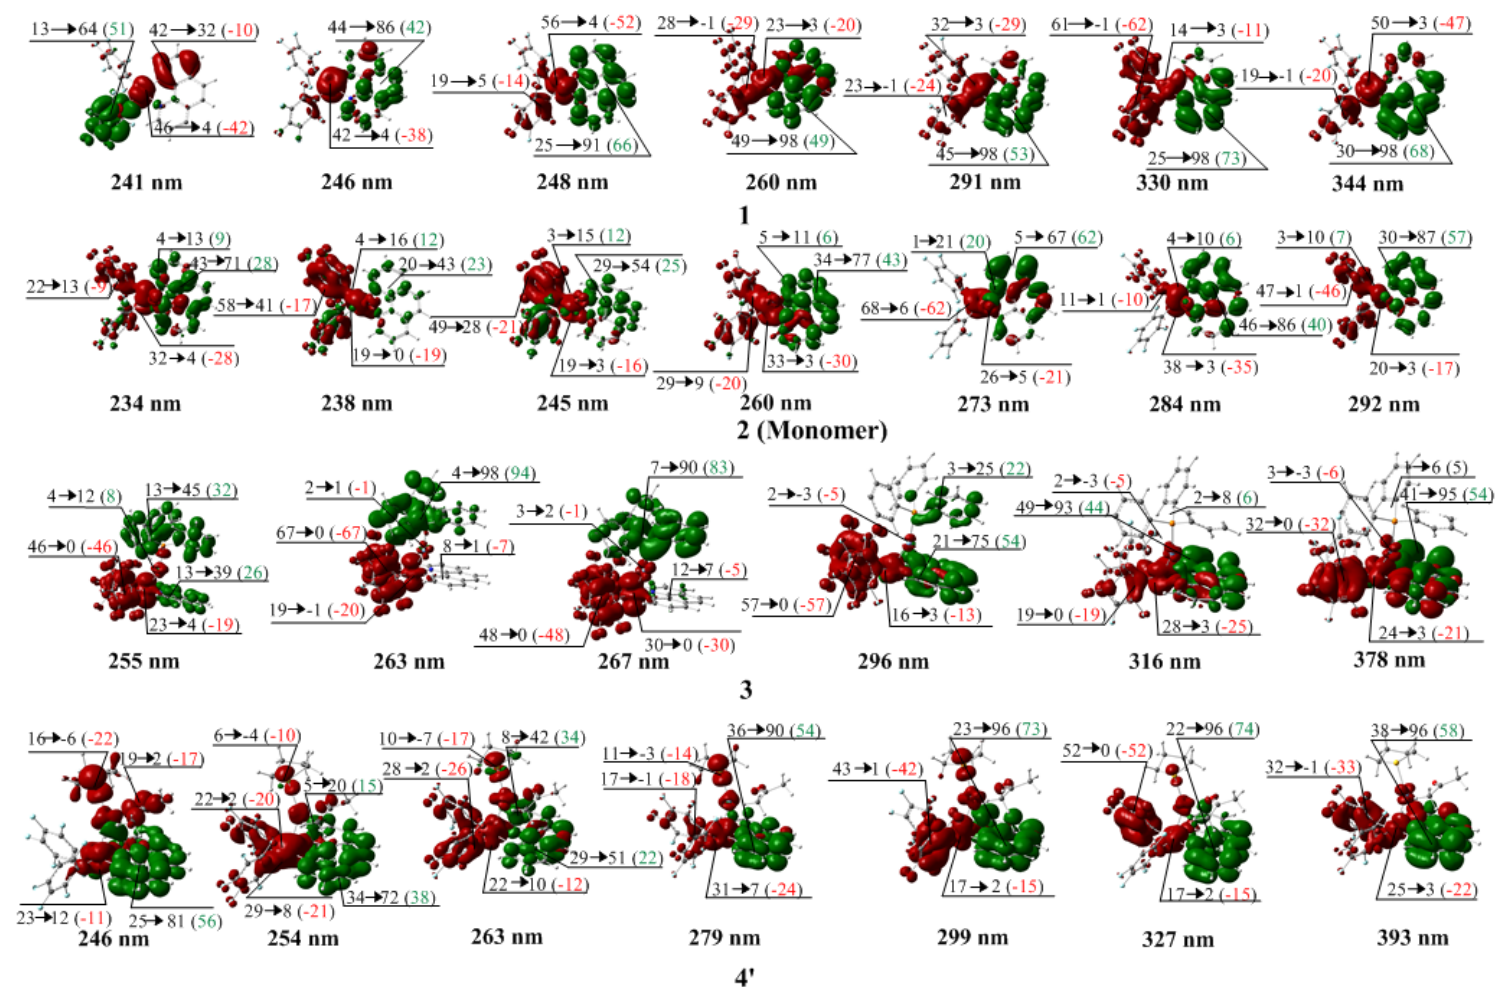

**Figure S9.** Electron density difference maps corresponding to electronic transitions in the absorption spectra of DCSs 1-3 and 4' along with the respective % percentage changes in the group charge density (negative sign means % charge depletion). Green and red colors show the regions of increased and decreased electron density, respectively.

### X-ray structure determination of **3** and **5**

Crystal data and other details of the structure analyses are presented in Table S1. Suitable crystals for X-ray diffraction studies were obtained by slow diffusion of *n*-hexane into concentrated solutions of the complexes in 3 mL of CH<sub>2</sub>Cl<sub>2</sub>. Crystals were mounted at the end of a quartz fibre. The radiation used in all cases was graphite monochromated MoK $\alpha$  ( $\lambda = 0.71073$  Å). For **3**·3CH<sub>2</sub>Cl<sub>2</sub>, X-ray intensity data were collected on a Bruker Smart Apex diffractometer. The diffraction frames were integrated using the SAINT program<sup>S1</sup> and the reflections corrected from absorption with SADABS.<sup>S2</sup> For **5**, X-ray intensity data were collected on an Oxford Diffraction Xcalibur diffractometer. The diffraction frames were integrated and corrected from absorption by using the CrysAlis RED program.<sup>S3</sup> The structures were solved by Patterson and Fourier methods and refined by full-matrix least squares on  $F^2$  with SHELXL-97.<sup>S4</sup> All non-hydrogen atoms were assigned anisotropic displacement parameters and refined without positional constraints, except as noted below. All hydrogen atoms were constrained to idealized geometries and assigned isotropic displacement parameters equal to 1.2 times the  $U_{\text{iso}}$  values of their attached parent atoms (1.5 times for the methyl hydrogen atoms). In the structure of **3**·3CH<sub>2</sub>Cl<sub>2</sub>, One of the dichloromethane solvent molecules was found to have a chlorine atom (Cl(6) and Cl(6')) disordered over two positions, which were refined with partial occupancy 0.7/0.3. The C–Cl distances for these atoms were constrained to sensible values and a common set of thermal anisotropic displacement parameters was used for the two disordered Cl atoms. Full-matrix least-squares refinement of these models against  $F^2$  converged to final residual indices given in Table 6.

### References

- S1 *SAINT Program for X-ray data integration version 5.0*, Bruker Analytical X-ray Systems, Madison, WI, 2000.
- S2 G. M. Sheldrick, *SADABS Empirical absorption correction program*, University of Göttingen, Göttingen, Germany, 1996.
- S3 *CrysAlis RED Program for X-ray CCD camera data reduction*, Oxford Diffraction Ltd, Oxford, UK, 2008.
- S4 G. M. Sheldrick, *SHELXL-97 Program for crystal structure refinement from diffraction data*, University of Göttingen, Göttingen, Germany, 1997.

**Table S1.** Crystal data and structure refinement for complexes  $[\{\text{Pt}(\text{bzq})(\text{C}_6\text{F}_5)_2\}\text{Ag}(\text{PPh}_3)] \cdot 3\text{CH}_2\text{Cl}_2$  (**3**·3CH<sub>2</sub>Cl<sub>2</sub>) and  $[\text{Pt}(\text{bzq})(\text{C}_6\text{F}_5)\text{py}]$  (**5**).

|                                                                                                 | <b>3</b> ·3CH <sub>2</sub> Cl <sub>2</sub>                                             | <b>5</b>                                                         |
|-------------------------------------------------------------------------------------------------|----------------------------------------------------------------------------------------|------------------------------------------------------------------|
| Formula                                                                                         | C <sub>43</sub> H <sub>23</sub> AgF <sub>10</sub> NPt·3CH <sub>2</sub> Cl <sub>2</sub> | C <sub>24</sub> H <sub>13</sub> F <sub>5</sub> N <sub>2</sub> Pt |
| <i>M<sub>t</sub></i>                                                                            | 1332.33                                                                                | 619.45                                                           |
| Crystal system                                                                                  | Triclinic                                                                              | Triclinic                                                        |
| Space group                                                                                     | <i>P</i> -1                                                                            | <i>P</i> -1                                                      |
| <i>a</i> /Å                                                                                     | 11.0608(2)                                                                             | 9.4647(2)                                                        |
| <i>b</i> /Å                                                                                     | 12.3316(2)                                                                             | 10.2895(3)                                                       |
| <i>c</i> /Å                                                                                     | 17.3806(3)                                                                             | 10.5812(2)                                                       |
| <i>α</i> /°                                                                                     | 88.838(1)                                                                              | 106.468(2)                                                       |
| <i>β</i> /°                                                                                     | 75.595(1)                                                                              | 96.835(2)                                                        |
| <i>γ</i> /°                                                                                     | 89.594(1)                                                                              | 92.411(2)                                                        |
| <i>V</i> /Å <sup>3</sup>                                                                        | 2295.66(7)                                                                             | 978.06(4)                                                        |
| <i>Z</i>                                                                                        | 2                                                                                      | 2                                                                |
| <i>D<sub>c</sub></i> /g cm <sup>-3</sup>                                                        | 1.927                                                                                  | 2.103                                                            |
| <i>T</i> /K                                                                                     | 123(1)                                                                                 | 100(1)                                                           |
| <i>μ</i> /mm <sup>-1</sup>                                                                      | 3.931                                                                                  | 7.235                                                            |
| <i>F</i> (000)                                                                                  | 1288                                                                                   | 588                                                              |
| 2 <i>θ</i> range/°                                                                              | 7.6-50.2                                                                               | 8.0-57.9                                                         |
| Collected reflections                                                                           | 14528                                                                                  | 15035                                                            |
| Unique reflections                                                                              | 7951                                                                                   | 4516                                                             |
| <i>R</i> <sub>int</sub>                                                                         | 0.0170                                                                                 | 0.0177                                                           |
| <i>R</i> <sub>1</sub> , <i>wR</i> <sub>2</sub> <sup><i>a</i></sup> ( <i>I</i> > 2σ( <i>I</i> )) | 0.0245, 0.0706                                                                         | 0.0145, 0.0344                                                   |
| <i>R</i> <sub>1</sub> , <i>wR</i> <sub>2</sub> <sup><i>a</i></sup> (all data)                   | 0.0265, 0.0713                                                                         | 0.0159, 0.0346                                                   |
| GOF ( <i>F</i> <sup>2</sup> ) <sup><i>b</i></sup>                                               | 1.039                                                                                  | 1.049                                                            |

<sup>*a*</sup>  $R_1 = \sum(|F_o| - |F_c|) / \sum |F_o|$ .  $wR_2 = [\sum w (F_o^2 - F_c^2)^2 / \sum w (F_o^2)^2]^{1/2}$ . <sup>*b*</sup> Goodness-of-fit =  $[\sum w (F_o^2 - F_c^2)^2 / (n_{\text{obs}} - n_{\text{param}})]^{1/2}$ .

**Table S2.** Selected bond lengths (Å) and angles (°) for [Pt(bzq)(C<sub>6</sub>F<sub>5</sub>)py] (**5**)

|               |            |               |            |
|---------------|------------|---------------|------------|
| Pt-C(17)      | 1.990(2)   | Pt-C(1)       | 2.006(2)   |
| Pt-N(1)       | 2.0868(19) | Pt-N(2)       | 2.1167(18) |
| C(17)-Pt-C(1) | 93.37(9)   | C(17)-Pt-N(1) | 81.96(8)   |
| C(1)-Pt-N(1)  | 174.84(8)  | C(17)-Pt-N(2) | 175.18(8)  |
| C(1)-Pt-N(2)  | 91.24(8)   | N(1)-Pt-N(2)  | 93.49(7)   |

**Table S3.** Selected bond lengths (Å) and angles (°) for [{Pt(bzq)(C<sub>6</sub>F<sub>5</sub>)<sub>2</sub>}Ag(PPh<sub>3</sub>)]·3CH<sub>2</sub>Cl<sub>2</sub> (**3**·3CH<sub>2</sub>Cl<sub>2</sub>)

|               |            |              |            |
|---------------|------------|--------------|------------|
| Pt-C(7)       | 2.014(3)   | Pt-C(23)     | 2.069(3)   |
| Pt-C(1)       | 2.070(3)   | Pt-N         | 2.087(3)   |
| Pt-Ag         | 2.727(1)   | Ag-P         | 2.370(1)   |
| Ag-C(23)      | 2.387(3)   |              |            |
| C(7)-Pt-C(23) | 97.76(13)  | C(7)-Pt-C(1) | 87.63(13)  |
| C(23)-Pt-C(1) | 173.51(12) | C(7)-Pt-N    | 176.17(12) |
| C(23)-Pt-N    | 80.88(12)  | C(1)-Pt-N    | 93.97(12)  |
| C(7)-Pt-Ag    | 85.14(10)  | C(23)-Pt-Ag  | 57.76(9)   |
| C(1)-Pt-Ag    | 119.49(9)  | N-Pt-Ag      | 97.07(7)   |
| P-Ag-C(23)    | 166.21(8)  | P-Ag-Pt      | 146.65(2)  |
| C(23)-Ag-Pt   | 47.14(8)   |              |            |

**Table S4.** Selected principal singlet-singlet optical transitions in the absorption spectra of complexes **1** and **2** in the gas phase calculated at the TD-DFT-PBE1PBE/Def2-TZVP(M)U6-31+G(d,p)(X) level.

| Excitation (% composition)                                                        | <i>E</i> (eV) | <i>λ</i> (nm) | <i>f</i> | %CT          | Assignment    |
|-----------------------------------------------------------------------------------|---------------|---------------|----------|--------------|---------------|
| [Pt(bzq)(C <sub>6</sub> F <sub>5</sub> ) <sub>2</sub> ] <sup>-</sup> ( <b>1</b> ) |               |               |          |              |               |
| HOMO→LUMO (84%)                                                                   | 2.847         | 435.5         | 0.013    | 40.0         | MLCT/LC       |
| H-2→L (92%) <sup>a</sup>                                                          | 3.054         | 406.0         | 0.013    | 35.0         | MLCT/LL'CT    |
| H <sup>b</sup> →L+1 (48%), H-3→L (39%)                                            | 3.414         | 363.2         | 0.018    | 21.6         | MLCT/LL'CT    |
| H-3→L (41%), H→L+1 (39%)                                                          | 3.605         | 344.0         | 0.117    | 20.3         | MLCT/L'LCT    |
| H-5→L (59%)                                                                       | 3.756         | 330.1         | 0.052    | 9.0          | MLCT/L'LCT    |
| H-7→L (59%)                                                                       | 4.045         | 306.5         | 0.022    | 20.0         | MLCT/LC/L'LCT |
| H-9→L (42%), H-3→L+1 (17%)                                                        | 4.264         | 290.7         | 0.044    | 10.7         | MLCT/LC/LL'CT |
| H-7→L+1 (38%), H-8→L+1 (19%)                                                      | 4.763         | 260.3         | 0.053    | 5.3          | MLCT/LC/L'LCT |
| H-3→L+3 (59%)                                                                     | 4.996         | 248.2         | 0.085    | 59.1         | MLCT/L'LCT    |
| H-9→L+1 (32%)                                                                     | 5.032         | 246.4         | 0.100    | 26.7         | MLCT/LC/L'LCT |
| H-9→L+1 (16%), H-3→L+2 (16%)                                                      | 5.052         | 245.4         | 0.048    | 8.9          | MLCT/LC       |
| H→L+8 (65%)                                                                       | 5.143         | 241.1         | 0.074    | 37.0         | LC/ML'CT      |
| [Pt(bzq)(C <sub>6</sub> F <sub>5</sub> ) <sub>2</sub> ]Ag ( <b>2</b> )            |               |               |          |              |               |
| HOMO→LUMO (95%)                                                                   | 2.502         | 495.6         | 0.0007   | 12.0 (-71.0) | L'M'CT        |
| H-2→L (44%), H-1→L (38%)                                                          | 2.682         | 462.2         | 0.031    | 0.9 (-28.0)  | L'M'CT        |
| H-5→L (84%)                                                                       | 3.263         | 380.0         | 0.016    | 30.0 (-8.0)  | L'MM'CT       |

|                              |       |       |       |              |                   |
|------------------------------|-------|-------|-------|--------------|-------------------|
| H-6→L (81%)                  | 3.302 | 375.4 | 0.028 | 34 (-60.0)   | LMM'CT            |
| H-2→L+1 (39%), H-1→L+1 (35%) | 3.454 | 359.0 | 0.024 | 3.7 (-2.7)   | MLCT/LL'CT        |
| H-4→L+1 (70%)                | 3.986 | 311.0 | 0.014 | 1.0 (-10.0)  | LL'CT/L'M'CT      |
| H-6→L+1 (46%), H-5→L+1 (25%) | 4.024 | 308.1 | 0.018 | 14.8 (-1.4)  | MLCT/LC           |
| H-3→L+2 (37%), H-1→L+2 (36%) | 4.187 | 296.1 | 0.026 | 4.3 (-2.5)   | L'LCT/LC/L'M'CT   |
| H-2→L+2 (56%), H-1→L+2 (21%) | 4.223 | 293.6 | 0.025 | 3.9 (-2.5)   | L'LCT/MLCT/L'M'CT |
| H-3→L+2 (47%), H-6→L+1 (16%) | 4.244 | 292.2 | 0.060 | 6.5 (-2.7)   | MLCT/LL'CT/LC     |
| H-8→L+1 (20%), H-5→L+2 (37%) | 4.361 | 284.3 | 0.035 | 12.1 (-0.5)  | MLCT/LC           |
| H-9→L+1 (61%), H-8→L+1 (23%) | 4.545 | 272.8 | 0.035 | 19.2 (-1.5)  | MLCT/LC           |
| H-8→L+1 (11%), H-7→L+2 (26%) | 4.764 | 260.3 | 0.076 | 12.1 (-54.7) | MLCT/LC/LL'CT     |
| H-5→L+3 (24%)                | 5.304 | 233.8 | 0.265 | 36.0 (-9.0)  | LMMLCT            |

<sup>a</sup> L = LUMO. <sup>b</sup> H = HOMO



**Table S5.** Selected principal singlet-singlet optical transitions in the absorption spectra of complexes **3** and **4'** in the gas phase calculated at the TD-DFT-PBE1PBE/Def2-TZVP(M)U6-31+G(d,p)(X) level.

| Excitation (% composition)                                                                       | <i>E</i> (eV) | $\lambda$ (nm) | <i>f</i> | %CT         | Assignment*      |
|--------------------------------------------------------------------------------------------------|---------------|----------------|----------|-------------|------------------|
| [Pt(bzq)(C <sub>6</sub> F <sub>5</sub> ) <sub>2</sub> ]Ag(PPh <sub>3</sub> ) ( <b>3</b> )        |               |                |          |             |                  |
| HOMO→LUMO (89%)                                                                                  | 3.085         | 402.0          | 0.006    | 25.0 (2.0)  | MLCT/L'LCT       |
| H-1→L (78%) <sup>a</sup>                                                                         | 3.280         | 378.1          | 0.049    | 21.2 (1.2)  | MLCT/L'LCT       |
| H-5→L (51%), H-3→L (31%)                                                                         | 3.549         | 349.3          | 0.012    | 16.5 (0.8)  | LC/MLCT          |
| H <sup>b</sup> →L+1 (54%), H-2→L (29%)                                                           | 3.632         | 341.4          | 0.015    | 10.7 (0.4)  | MLCT/L'LCT       |
| H-1→L+1 (56%), H-6→L (25%)                                                                       | 3.760         | 329.7          | 0.015    | 9.5 (0.2)   | LC/MLCT/LL'CT    |
| H-6→L (35%), H-1→L+1 (27%)                                                                       | 3.926         | 315.8          | 0.087    | 7.8 (0.2)   | L'LCT/MLCT/LC    |
| H-3→L+1 (46%), H-2→L+1 (27%)                                                                     | 4.098         | 302.5          | 0.026    | 1.3 (-0.1)  | L'LCT            |
| H-2→L+1 (34%), H→L+2 (17%)                                                                       | 4.182         | 296.5          | 0.026    | 3.6 (-0.6)  | L'LCT/MLCT       |
| H-7→L (40%), H-10→L (11%)                                                                        | 4.425         | 280.2          | 0.025    | 4.4 (1.9)   | M'L''LCT/LC/MLCT |
| H-8→L+1 (24%), H-9→L (17%)                                                                       | 4.538         | 273.2          | 0.033    | 5.4 (0.7)   | LC/MLCT/LL'CT    |
| H-5→L+2 (34%), H-4→L+2 (16%)                                                                     | 4.637         | 267.4          | 0.057    | 10.6 (-0.3) | LC/L'LCT/ML''CT  |
| H-4→L+4 (27%), H-5→L+4 (15%)                                                                     | 4.868         | 254.7          | 0.059    | 4.2 (-3.3)  | L''L'/MM'L'CT    |
| [Pt(bzq)(C <sub>6</sub> F <sub>5</sub> ) <sub>2</sub> ]Ag(tht)(Me <sub>2</sub> CO) ( <b>4'</b> ) |               |                |          |             |                  |
| HOMO→LUMO (88%)                                                                                  | 2.993         | 414.0          | 0.008    | 27.0 (0.0)  | MLCT/L'LCT       |
| H-1→L (80%)                                                                                      | 3.152         | 393.3          | 0.039    | 22.3 (0.1)  | MLCT/L'LCT       |
| H-4→L (34%), H-1→L+1 (30%)                                                                       | 3.792         | 327.0          | 0.066    | 5.6 (0.8)   | LC/L'LCT         |

|                             |       |       |       |            |                         |
|-----------------------------|-------|-------|-------|------------|-------------------------|
| H-4→L (60%), H-1→L+1 (17%)  | 3.802 | 326.1 | 0.047 | 8.0 (0.1)  | L'LCT/LC                |
| H-2→L+1 (34%), H-7→L (23%)  | 4.154 | 298.5 | 0.022 | 4.5 (1.9)  | L'LCT/LC/L''LCT         |
| H-9→L (28%), H-6→L+1 (14%)  | 4.331 | 286.3 | 0.027 | 7.0 (1.3)  | L'LMLCT                 |
| H-10→L (42%), H-1→L+3 (15%) | 4.443 | 279.0 | 0.029 | 9.0 (0.5)  | LC/MLCT                 |
| H-7→L+1 (31%), H→L+4 (24%)  | 4.721 | 262.6 | 0.048 | 3.5 (-5.5) | LC/L''LCT/ML'M'CT       |
| H-9,-10→L+1 (21%)           | 4.882 | 254.0 | 0.152 | 4.7 (-2.7) | L''LMLCT                |
| H-6→L+3 (33%), H-11→L (23%) | 5.048 | 245.6 | 0.047 | 2.9 (1.8)  | L''LMM'LCT/L'''L''M'LCT |

\* L = bzq; L' = C<sub>6</sub>F<sub>5</sub>; L'' = PPh<sub>3</sub> or tht; L''' = Acet

<sup>a</sup> L = LUMO. <sup>b</sup> H = HOMO

**Table S6.** Partial molecular orbital compositions of **1** calculated by TD-DFT

| MO   | Energy (eV) | Composition(%) |      |       | Orbital Assignment                                                |
|------|-------------|----------------|------|-------|-------------------------------------------------------------------|
|      |             | %Pt            | %bzq | %Arfs |                                                                   |
| L+8  | 2.73        | 6.0            | 18.0 | 76.0  | $d_{x^2-y^2}(\text{Pt}) - \pi^*(\text{bzq}) - \pi^*(\text{Arfs})$ |
| L+4  | 2.16        | 26.0           | 51.0 | 23.0  | $d_{xy}(\text{Pt}) - \pi^*(\text{bzq}) - \pi^*(\text{Arfs})$      |
| L+3  | 2.01        | 5.0            | 94.1 | 1.0   | $\pi^*(\text{bzq})$                                               |
| L+2  | 1.95        | 14.2           | 77.3 | 8.5   | $\pi^*(\text{bzq})$                                               |
| L+1  | 1.11        | 3.0            | 97.0 | 0.0   | $d_{xz}(\text{Pt}) - \pi^*(\text{bzq})$                           |
| LUMO | 0.47        | 3.0            | 97.0 | 0.0   | $d_{xz}(\text{Pt}) - \pi^*(\text{bzq})$                           |
| HOMO | -3.27       | 43.0           | 46.0 | 11.0  | $d_{yz}(\text{Pt}) - \pi^*(\text{bzq})$                           |
| H-2  | -3.39       | 38.0           | 14.0 | 48.0  | $d_{x^2-y^2}(\text{Pt}) - \pi^*(\text{bzq}) - \pi^*(\text{Arfs})$ |
| H-3  | -3.87       | 64.0           | 16.0 | 20.0  | $d_{yz}(\text{Pt}) - \pi^*(\text{bzq}) - \pi^*(\text{Arfs})$      |
| H-5  | -4.09       | 12.0           | 23.0 | 65.0  | $d_{yz}(\text{Pt}) - \pi^*(\text{bzq}) - \pi^*(\text{Arfs})$      |
| H-7  | -4.46       | 23.0           | 66.0 | 11.0  | $d_{xz}(\text{Pt}) - \pi^*(\text{bzq}) - \pi^*(\text{Arfs})$      |
| H-8  | -4.57       | 19.0           | 37.0 | 44.0  | $d_{xz}(\text{Pt}) - \pi^*(\text{bzq}) - \pi^*(\text{Arfs})$      |
| H-9  | -4.65       | 29.7           | 62.4 | 7.9   | $d_{yz}(\text{Pt}) - \pi^*(\text{bzq}) - \pi^*(\text{Arfs})$      |

**Table S7.** Partial molecular orbital compositions of **2** calculated by TD-DFT

| MO   | Energy (eV) | % Composition |      |      |       | Orbital Assignment                                                |
|------|-------------|---------------|------|------|-------|-------------------------------------------------------------------|
|      |             | %Pt           | %Ag  | %bzq | %Arfs |                                                                   |
| L+4  | -0.66       | 1.0           | 20.2 | 29.3 | 49.5  | $d_{yz}(\text{Ag}) - \pi^*(\text{bzq}) - \pi^*(\text{Arfs})$      |
| L+3  | -1.25       | 5.0           | 11.0 | 81.0 | 3.0   | $\pi^*(\text{bzq})$                                               |
| L+2  | -2.03       | 3.0           | 9.1  | 87.9 | 0.0   | $\pi^*(\text{bzq})$                                               |
| L+1  | -2.51       | 2.0           | 10.0 | 87.0 | 1.0   | $\pi^*(\text{bzq})$                                               |
| LUMO | -3.22       | 11.0          | 71.0 | 17.0 | 1.0   | $d_{z^2}(\text{Ag})$                                              |
| HOMO | -6.61       | 23.0          | 0.0  | 4.0  | 73.0  | $d_{x^2-y^2}(\text{Pt}) - \pi^*(\text{Arfs})$                     |
| H-1  | -6.8        | 10.0          | 2.0  | 20.0 | 68.0  | $\pi^*(\text{bzq}) - \pi^*(\text{Arfs})$                          |
| H-2  | -6.84       | 14.1          | 3.0  | 30.3 | 52.5  | $d_{xz}(\text{Pt}) - \pi^*(\text{bzq}) - \pi^*(\text{Arfs})$      |
| H-3  | -6.94       | 6.9           | 2.0  | 17.8 | 73.3  | $\pi^*(\text{bzq}) - \pi^*(\text{Arfs})$                          |
| H-4  | -7.06       | 1.0           | 0.0  | 1.0  | 98.0  | $\pi^*(\text{Arfs})$                                              |
| H-5  | -7.47       | 41.0          | 2.0  | 56.0 | 1.0   | $d_{yz}(\text{Pt}) - \pi^*(\text{bzq})$                           |
| H-6  | -7.52       | 45.0          | 11.0 | 43.0 | 1.0   | $d_{z^2}(\text{Pt}) - \pi^*(\text{bzq})$                          |
| H-7  | -7.87       | 21.0          | 7.0  | 37.0 | 35.0  | $d_{yz}(\text{Pt}) - \pi^*(\text{bzq}) - \pi^*(\text{Arfs})$      |
| H-8  | -7.97       | 46.0          | 5.0  | 44.0 | 5.0   | $d_{yz}(\text{Pt}) - \pi^*(\text{bzq})$                           |
| H-9  | -8.04       | 48.0          | 7.0  | 40.0 | 5.0   | $d_{xz}(\text{Pt}) - \pi^*(\text{bzq})$                           |
| H-12 | -8.04       | 48.0          | 7.0  | 40.0 | 5.0   | $d_{x^2-y^2}(\text{Pt}) - \pi^*(\text{bzq}) - \pi^*(\text{Arfs})$ |

**Table S8.** Partial molecular orbital compositions of **3** calculated by TD-DFT

| MO   | Energy (eV) | % Composition |      |      |      |      | Orbital Assignment                                                |
|------|-------------|---------------|------|------|------|------|-------------------------------------------------------------------|
|      |             | Pt            | Ag   | Phos | Arfs | bzq  |                                                                   |
| L+4  | -1.24       | 4.0           | 20.0 | 53.0 | 0.0  | 23.0 | $d_{x^2-y^2}(\text{Pt}) - \pi^*(\text{Phos}) - \pi^*(\text{bzq})$ |
| L+3  | -1.42       | 0.0           | 1.0  | 98.0 | 0.0  | 1.0  | $\pi^*(\text{Phos})$                                              |
| L+2  | -1.52       | 1.0           | 2.0  | 93.0 | 0.0  | 4.0  | $\pi^*(\text{Phos})$                                              |
| L+1  | -1.82       | 2.8           | 2.8  | 9.3  | 0.9  | 84.1 | $\pi^*(\text{bzq})$                                               |
| LUMO | -2.28       | 2.8           | 1.9  | 5.7  | 0.0  | 89.6 | $\pi^*(\text{bzq})$                                               |
| HOMO | -6.24       | 27.7          | 4.0  | 0.0  | 56.4 | 11.9 | $d_{xy}(\text{Pt}) - \pi^*(\text{Arfs}) - \pi^*(\text{bzq})$      |
| H-1  | -6.39       | 24.0          | 3.0  | 1.0  | 28.0 | 44.0 | $d_{x^2-y^2}(\text{Pt}) - \pi^*(\text{Arfs}) - \pi^*(\text{bzq})$ |
| H-2  | -6.58       | 2.0           | 1.0  | 0.0  | 94.0 | 3.0  | $\pi^*(\text{Arfs})$                                              |
| H-3  | -6.65       | 9.0           | 2.0  | 0.0  | 81.0 | 8.0  | $\pi^*(\text{Arfs})$                                              |
| H-4  | -6.7        | 1.0           | 0.0  | 0.0  | 96.0 | 3.0  | $\pi^*(\text{Arfs})$                                              |
| H-5  | -6.89       | 63.4          | 5.0  | 12.9 | 0.0  | 18.8 | $d_{xz}(\text{Pt}) - \pi^*(\text{Phos}) - \pi^*(\text{bzq})$      |
| H-6  | -7.07       | 31.0          | 1.0  | 3.0  | 5.0  | 60.0 | $d_{z^2}(\text{Pt}) - \pi^*(\text{bzq})$                          |
| H-7  | -7.31       | 6.0           | 11.0 | 60.0 | 2.0  | 21.0 | $d_{x^2-y^2}(\text{Ag}) - \pi^*(\text{Phos}) - \pi^*(\text{bzq})$ |
| H-8  | -7.47       | 27.0          | 5.0  | 0.0  | 16.0 | 52.0 | $d_{z^2}(\text{Pt}) - \pi^*(\text{Arfs}) - \pi^*(\text{bzq})$     |
| H-9  | -7.61       | 31.0          | 7.0  | 3.0  | 21.0 | 38.0 | $d_{z^2}(\text{Pt}) - \pi^*(\text{Arfs}) - \pi^*(\text{bzq})$     |
| H-10 | -7.65       | 45.0          | 2.0  | 5.0  | 8.0  | 40.0 | $d_{x^2-y^2}(\text{Pt}) - \pi^*(\text{bzq})$                      |

**Table S9.** Partial molecular orbital compositions of **4'** calculated by TD-DFT

| MO   | Energy (eV) | % Composition |      |      |          |      |      | Orbital Assignment                                                                          |
|------|-------------|---------------|------|------|----------|------|------|---------------------------------------------------------------------------------------------|
|      |             | Pt            | Ag   | Acet | S-ligand | Arfs | bzq  |                                                                                             |
| L+8  | -0.04       | 10.9          | 4.0  | 10.9 | 17.8     | 48.5 | 7.9  | $d_{xy}(\text{Pt}) - \pi^*(\text{Acet}) - \pi^*(\text{Arfs}) - \pi^*(\text{S-ligand})$      |
| L+7  | -0.23       | 3.7           | 19.3 | 5.5  | 27.5     | 11.9 | 32.1 | $d_{xz}(\text{Ag}) - \pi^*(\text{S-ligand}) - \pi^*(\text{bzq})$                            |
| L+5  | -0.44       | 6.1           | 8.7  | 12.2 | 19.1     | 15.7 | 38.3 | $\pi^*(\text{Acet}) - \pi^*(\text{S-ligand}) - \pi^*(\text{Arfs}) - \pi^*(\text{S-ligand})$ |
| L+4  | -0.64       | 14.9          | 63.7 | 2.4  | 14.9     | 0.6  | 3.6  | $d_{xz}(\text{Pt}) - d_{z^2}(\text{Ag}) - \pi^*(\text{S-ligand})$                           |
| L+3  | -0.97       | 15.0          | 10.8 | 2.5  | 6.7      | 0.8  | 64.2 | $d_{xy}(\text{Pt}) - d_{xz}(\text{Ag}) - \pi^*(\text{bzq})$                                 |
| L+1  | -1.81       | 1.0           | 2.0  | 0.0  | 0.0      | 2.0  | 95.0 | $\pi^*(\text{bzq})$                                                                         |
| LUMO | -2.34       | 3.0           | 2.0  | 0.0  | 0.0      | 0.0  | 95.0 | $\pi^*(\text{bzq})$                                                                         |
| HOMO | -6.21       | 30.0          | 2.0  | 0.0  | 0.0      | 55.0 | 13.0 | $d_{xy}(\text{Pt}) - \pi^*(\text{Arfs})$                                                    |
| H-1  | -6.32       | 25.3          | 4.0  | 0.0  | 1.0      | 28.3 | 41.4 | $d_{xz}(\text{Pt}) - \pi^*(\text{Arfs}) - \pi^*(\text{bzq})$                                |
| H-2  | -6.55       | 2.0           | 1.0  | 0.0  | 0.0      | 95.0 | 2.0  | $\pi^*(\text{Arfs})$                                                                        |
| H-3  | -6.61       | 16.2          | 3.0  | 0.0  | 0.0      | 73.7 | 7.1  | $d_{yz}(\text{Pt}) - \pi^*(\text{Arfs})$                                                    |
| H-4  | -6.72       | 1.0           | 0.0  | 0.0  | 1.0      | 97.0 | 1.0  | $\pi^*(\text{Arfs})$                                                                        |
| H-5  | -6.85       | 54.0          | 7.0  | 0.0  | 5.0      | 7.0  | 27.0 | $d_{z^2}(\text{Pt}) - \pi^*(\text{bzq})$                                                    |
| H-6  | -6.90       | 31.7          | 11.9 | 5.0  | 16.8     | 5.0  | 29.7 | $d_{yz}(\text{Pt}) - \pi^*(\text{S-ligand}) - \pi^*(\text{bzq})$                            |
| H-7  | -7.25       | 12.0          | 15.0 | 6.0  | 23.0     | 3.0  | 41.0 | $\pi^*(\text{S-ligand}) - \pi^*(\text{bzq})$                                                |
| H-9  | -7.52       | 37.0          | 6.0  | 0.0  | 1.0      | 15.0 | 41.0 | $d_{yz}(\text{Pt}) - \pi^*(\text{bzq})$                                                     |
| H-10 | -7.67       | 40.6          | 2.0  | 1.0  | 13.9     | 6.9  | 35.6 | $d_{yz}(\text{Pt}) - \pi^*(\text{bzq})$                                                     |
| H-11 | -8.13       | 4.0           | 16.0 | 49.0 | 17.0     | 2.0  | 12.0 | $\pi^*(\text{Acet}) - \pi^*(\text{S-ligand})$                                               |

**Table S10.** Cartesian Coordinates of the Stationary Points on the PES of **1-3** and **4'** in their  $S_0$  and  $T_1$  states.

**1,  $S_0$**

Pt 0.4261111942 -0.0239988367 -0.0142054196  
F -1.456852065 -0.9409307559 2.4077391287  
F -3.309305245 -2.8619928121 2.5984570043  
F -3.8919044418 -4.4443194527 0.4529222979  
F -2.5640512564 -4.0648791685 -1.8995724418  
F -0.6959048101 -2.1656315734 -2.1166361431  
F -0.5186701716 2.2802391259 2.0849524729  
F -2.4539412002 4.1312923756 2.0280595762  
F -4.0702865987 4.3741285636 -0.1542083949  
F -3.720582689 2.7148210642 -2.287512093  
F -1.8080145423 0.8398858296 -2.2508135349  
N 2.023280803 1.3192802054 -0.1826940025  
C -0.9762268853 -1.4449664054 0.1340502435  
C -1.6899123846 -1.6845933592 1.3090708069  
C -2.6588159772 -2.6739632777 1.4371973515  
C -2.9597535986 -3.4825856979 0.3504415748  
C -2.2800297589 -3.2842061028 -0.8428209865  
C -1.3150967036 -2.2856976689 -0.9278341955  
C -1.065168324 1.4466123514 -0.0757478149  
C -1.2934074678 2.32850909 0.9778194574  
C -2.283699144 3.3063441143 0.9793790546  
C -3.1101709211 3.4357697412 -0.1277567084  
C -2.9262064543 2.586337429 -1.2102871898  
C -1.9225176763 1.6242713089 -1.158866816  
C 1.9640907516 2.6388275631 -0.324482711  
H 0.9685617679 3.0688694279 -0.3513572848  
C 3.1090056289 3.4397579801 -0.4336722875  
H 2.9952705191 4.5131836672 -0.5449303672  
C 4.3562551102 2.8463870134 -0.3945238182  
H 5.261901586 3.4437277348 -0.4753738789  
C 4.4511243976 1.4512363784 -0.2496579963  
C 5.6873501371 0.7269749659 -0.200423787  
H 6.6189922824 1.2831926497 -0.2760190002  
C 5.6966263765 -0.6299774878 -0.0625890969  
H 6.644218696 -1.1644938528 -0.0269643505  
C 4.4825171276 -1.388449679 0.0369735105  
C 4.4559030367 -2.7893293903 0.1765779131  
H 5.3883170459 -3.3484589325 0.2144809175  
C 3.2328883207 -3.4351185888 0.2627056065  
H 3.2098669166 -4.5182930335 0.3698060219  
C 2.017491502 -2.7270985069 0.2139766904  
H 1.0893425624 -3.2891736184 0.2859502609  
C 1.9720056159 -1.338710851 0.0750950319  
C 3.2436671069 -0.7018463334 -0.0079638308  
C 3.2471078307 0.7171228059 -0.1483747712

### 1, T<sub>1</sub>

Pt 0.4516904134 -0.0238557078 -0.045960708  
F -1.4557486354 -0.9364979589 2.3626684649  
F -3.3234388482 -2.8466524404 2.5413831878  
F -3.8898104763 -4.4334162072 0.3961509939  
F -2.5333273418 -4.0734198273 -1.9419203505  
F -0.6499363803 -2.1851792015 -2.1442972488  
F -0.4559625404 2.2685731348 2.0785666348  
F -2.4074573493 4.1079891761 2.0745325331  
F -4.0866620044 4.3318111528 -0.0594439652  
F -3.7898406938 2.6685571715 -2.1973837538  
F -1.8615670454 0.8044857684 -2.208331839  
N 2.0434229842 1.3378795237 -0.219864021  
C -0.9565915187 -1.4540584625 0.0980027807  
C -1.6835922526 -1.6836542143 1.2661429414  
C -2.659634257 -2.667017141 1.387776878  
C -2.9523262978 -3.4780243679 0.3002632177  
C -2.2581173132 -3.2897409563 -0.8864613251  
C -1.2870882428 -2.2964817901 -0.9640907232  
C -1.0602223618 1.4363257702 -0.0634761719  
C -1.2596173859 2.3165679907 0.9959330775  
C -2.2588328772 3.2843342 1.0233888492  
C -3.1184837175 3.4030314805 -0.0599950378  
C -2.9621564244 2.5519859922 -1.1454106832  
C -1.9510404546 1.5969778688 -1.1199886245  
C 1.9788474975 2.6905555024 -0.39262885  
H 0.9850986049 3.1175225335 -0.4392680042  
C 3.1261848486 3.4685454552 -0.5003298975  
H 3.0162045927 4.5411360291 -0.6337335028  
C 4.3869695924 2.8889982361 -0.437617142  
H 5.28955026 3.488062628 -0.5195044463  
C 4.4865588636 1.4680716318 -0.2647904264  
C 5.6754201757 0.7433260016 -0.1903497207  
H 6.6198058644 1.2777525195 -0.2643605837  
C 5.6874697857 -0.6779183481 -0.0236514081  
H 6.6355743398 -1.2075308776 0.0238256845  
C 4.4889431048 -1.3789781581 0.0711710769  
C 4.408009531 -2.8041300456 0.2328272169  
H 5.329909834 -3.3790577117 0.2924776153  
C 3.17649768 -3.4433522312 0.3144087785  
H 3.143847472 -4.5238079702 0.4375623347  
C 1.9837760364 -2.7198854399 0.2457359702  
H 1.0359299533 -3.2439994716 0.3229679348  
C 1.9826921645 -1.2918506809 0.0711114367  
C 3.2509985471 -0.6724349364 0.0006045338  
C 3.249430273 0.7465103796 -0.1642777077



## 2, S<sub>0</sub>

Pt 0.2699999271 0.1370473863 -0.2182779012  
Ag 1.1665317456 -0.9500080295 2.0287383591  
F -1.0553199179 1.789712889 2.1968466335  
F -3.1371234245 3.4765292859 2.3345589801  
F -4.5563203264 4.10098786 0.0948001662  
F -3.8600083546 3.0048959112 -2.2988191943  
F -1.7855604183 1.3036988734 -2.4590087966  
F -1.4586528798 -1.4100626786 2.1031482707  
F -3.2278341437 -3.3998466005 1.9026292266  
F -3.7785153301 -4.536768356 -0.5184091816  
F -2.5001488494 -3.6316834874 -2.7471799912  
F -0.7261855051 -1.6330381578 -2.5808734557  
N 1.7348557421 1.6467290566 -0.298504814  
C -1.3341925847 1.4563894729 -0.1399755262  
C -1.7312084038 2.05077858 1.0528263867  
C -2.8009014007 2.9328801515 1.1594976242  
C -3.5275601939 3.2545890749 0.0198515408  
C -3.1684043578 2.6921784188 -1.1989995067  
C -2.0907938916 1.8139017845 -1.2506451808  
C -1.032652874 -1.3964063694 -0.242505747  
C -1.7061685724 -1.9101392184 0.8593708314  
C -2.6247478643 -2.9511294695 0.7982671683  
C -2.9037190397 -3.5344436384 -0.4300135496  
C -2.2489955712 -3.0682961812 -1.5639876888  
C -1.3348607404 -2.026542794 -1.4515433195  
C 1.5377746148 2.9601269403 -0.2962174859  
H 0.5089857957 3.2884071639 -0.1913484813  
C 2.5904167579 3.8770467235 -0.4282113315  
H 2.370785006 4.9390610331 -0.4158170766  
C 3.8797221781 3.4101308308 -0.5816690718  
H 4.7115870107 4.1005344032 -0.6960288727  
C 4.1165968836 2.0218463895 -0.5954543037  
C 5.4083853043 1.4274927314 -0.7708864081  
H 6.2678939312 2.0805410448 -0.8960100757  
C 5.5592787755 0.0725851856 -0.7933571938  
H 6.5448720084 -0.3622129129 -0.9400788224  
C 4.4389553098 -0.8081050386 -0.629351489  
C 4.5550002078 -2.2163398926 -0.6504078369  
H 5.5317341737 -2.6702244947 -0.7971324263  
C 3.4328511411 -3.0043444026 -0.4883568452  
H 3.5285539997 -4.0868186102 -0.5119712701  
C 2.1573822548 -2.4287175546 -0.2961296089  
H 1.2947780221 -3.0859764521 -0.2079383057  
C 1.9746802917 -1.0404809824 -0.2748218914  
C 3.155046143 -0.2519059171 -0.4371222198  
C 3.0041654198 1.1681170476 -0.4397483179

## 2, T<sub>1</sub>

Pt 0.2332248083 0.126696245 -0.5243251492  
Ag 1.0876045906 -0.4547739781 2.1887082785  
F -0.2580270166 2.115925979 2.0626821892  
F -2.2726689663 3.7657727737 2.6517969872  
F -4.3934355995 4.0210663337 0.9653100013  
F -4.4627078391 2.5858240654 -1.3472727902  
F -2.461944678 0.9186324418 -1.9682500883  
F -1.8477125524 -1.2482667504 1.5824307471  
F -3.5429911811 -3.2910076265 1.2646073329  
F -3.6917388336 -4.6048671337 -1.1132905528  
F -2.1036201541 -3.8420310824 -3.1865024214  
F -0.3927832571 -1.7965011598 -2.8985859725  
N 1.6799706261 1.6686547881 -0.6228725076  
C -1.2779646354 1.4273194695 0.0265673145  
C -1.2812482653 2.187785917 1.1899458231  
C -2.3150437999 3.0553881162 1.5236357226  
C -3.3996890217 3.1882773666 0.66584844  
C -3.431929247 2.4532201285 -0.5123690983  
C -2.3825185755 1.5894180391 -0.8077692139  
C -1.0438656994 -1.4224061717 -0.6492443215  
C -1.8780138118 -1.8541886285 0.3821018951  
C -2.7671491855 -2.9137093401 0.2469826608  
C -2.8455563041 -3.5885169977 -0.965532061  
C -2.0319748923 -3.1954003874 -2.0219654378  
C -1.1553347883 -2.1325400956 -1.8466351538  
C 1.488479239 2.9716199385 -0.8197987466  
H 0.4568110088 3.3035583897 -0.8743568503  
C 2.5498372852 3.871024642 -0.9543937865  
H 2.3347172138 4.9223286352 -1.1108540051  
C 3.8530735766 3.4032297313 -0.8984047319  
H 4.6924232743 4.0839549955 -1.0134701314  
C 4.0856991507 2.032191165 -0.7008811124  
C 5.383214664 1.423125149 -0.6610446267  
H 6.2580924682 2.0568858144 -0.7777656718  
C 5.5219952228 0.0767370152 -0.4993075443  
H 6.5125955904 -0.3708172126 -0.4923490927  
C 4.3832186489 -0.7824237787 -0.3358299541  
C 4.4773091558 -2.1788746893 -0.1845297463  
H 5.4554691595 -2.6521671425 -0.179831334  
C 3.3248738433 -2.9503966395 -0.0597693844  
H 3.4099240553 -4.0303539665 0.0237193549  
C 2.0558372493 -2.3655443761 -0.0135507659  
H 1.18155837 -2.994959075 0.1185761374  
C 1.9086266555 -0.972460312 -0.1419331533  
C 3.0957382285 -0.1977883373 -0.3407994809  
C 2.9585822191 1.1940747424 -0.5556959981

### 3, S<sub>0</sub>

Pt -1.558396 0.74168 -0.378154  
Ag 1.100678 0.290902 -0.312576  
P 3.138504 -0.614357 0.520676  
F -4.713412 -0.00471 -0.506431  
F -6.398488 -1.087253 1.281334  
F -5.522507 -1.750384 3.772916  
F -2.920393 -1.303418 4.456716  
F -1.224819 -0.205661 2.696037  
F -2.743324 0.054924 -3.209519  
F -2.938638 -2.229037 -4.588614  
F -1.957201 -4.554942 -3.559924  
F -0.776857 -4.54898 -1.103182  
F -0.571421 -2.28188 0.301924  
N -1.449113 2.629699 0.546486  
C -2.887212 -0.063469 1.001742  
C -4.224566 -0.313426 0.70986  
C -5.121293 -0.873003 1.61409  
C -4.679965 -1.213231 2.886956  
C -3.354321 -0.982195 3.230457  
C -2.500835 -0.417493 2.289376  
C -1.639968 -0.994834 -1.388905  
C -2.238244 -1.056283 -2.649123  
C -2.356789 -2.230259 -3.385338  
C -1.861397 -3.418581 -2.86446  
C -1.261743 -3.410245 -1.612464  
C -1.167161 -2.214998 -0.907771  
C -2.05804 3.014872 1.662329  
H -2.645406 2.258554 2.171411  
C -1.963201 4.322319 2.158585  
H -2.48069 4.578093 3.076844  
C -1.223713 5.257734 1.463801  
H -1.142952 6.281324 1.821089  
C -0.574048 4.87978 0.273758  
C 0.196682 5.773224 -0.539261  
H 0.300647 6.806898 -0.220013  
C 0.774508 5.343454 -1.696656  
H 1.342835 6.03772 -2.311119  
C 0.646757 3.984673 -2.13943  
C 1.216511 3.510269 -3.340788  
H 1.78522 4.190512 -3.969897  
C 1.038523 2.191636 -3.711309  
H 1.469376 1.83267 -4.642647  
C 0.304373 1.297857 -2.902943  
H 0.173335 0.274815 -3.248284  
C -0.279443 1.701768 -1.697745  
C -0.087185 3.072768 -1.346426  
C -0.708071 3.539372 -0.148163  
C 4.644612 0.128622 -0.203205  
C 4.62847 1.495092 -0.509529  
H 3.724276 2.0774 -0.344543  
C 5.76128 2.110835 -1.034105  
H 5.738804 3.171377 -1.267763  
C 6.914101 1.363585 -1.273386  
H 7.794891 1.841959 -1.692323  
C 6.931007 0.000159 -0.985851  
H 7.823831 -0.587462 -1.180157  
C 5.801763 -0.617832 -0.451254  
H 5.81884 -1.682734 -0.235886  
C 3.303898 -2.411412 0.241736  
C 2.822325 -2.945051 -0.959652  
H 2.342239 -2.295679 -1.68868  
C 2.939495 -4.306919 -1.219615  
H 2.551251 -4.71429 -2.148386  
C 3.529449 -5.147662 -0.276729

H 3.607216 -6.213063 -0.473453  
C 4.001395 -4.623912 0.925169  
H 4.450274 -5.278572 1.666811  
C 3.889745 -3.259782 1.187428  
H 4.246476 -2.858972 2.132367  
C 3.308805 -0.39272 2.326157  
C 4.52795 -0.071964 2.932811  
H 5.416925 0.078284 2.326366  
C 4.602042 0.063379 4.318257  
H 5.550748 0.316098 4.783494  
C 3.464897 -0.122838 5.102286  
H 3.52568 -0.015641 6.181693  
C 2.247018 -0.438066 4.500222  
H 1.354045 -0.575462 5.102978  
C 2.164665 -0.565645 3.116507  
H 1.206494 -0.795199 2.655759

### 3, T<sub>1</sub>

Pt -1.3994 0.6274 -0.1257  
Ag 1.3241 0.4674 -0.5443  
P 3.3228 -0.5227 0.3576  
F -4.6111 0.5737 -0.6355  
F -6.6686 -0.0755 0.9600  
F -6.2277 -0.8460 3.5312  
F -3.6812 -0.9491 4.4987  
F -1.6078 -0.2790 2.9292  
F -2.8178 -0.5556 -2.7589  
F -2.9533 -3.0309 -3.7509  
F -1.7140 -5.1004 -2.4873  
F -0.3354 -4.6396 -0.1797  
F -0.1882 -2.1774 0.8425  
N -1.3157 2.5858 0.6231  
C -3.0207 0.1577 1.0700  
C -4.3360 0.1983 0.6220  
C -5.4198 -0.1321 1.4295  
C -5.2000 -0.5253 2.7440  
C -3.9011 -0.5763 3.2332  
C -2.8478 -0.2313 2.3936  
C -1.4838 -1.2341 -0.9135  
C -2.1862 -1.5281 -2.0843  
C -2.2738 -2.8080 -2.6225  
C -1.6460 -3.8678 -1.9806  
C -0.9444 -3.6286 -0.8069  
C -0.8833 -2.3347 -0.3031  
C -1.7931 3.0622 1.7729  
H -2.2722 2.3426 2.4281  
C -1.6959 4.4046 2.1430  
H -2.1122 4.7176 3.0940  
C -1.0634 5.3147 1.2923  
H -0.9733 6.3629 1.5644  
C -0.5499 4.8595 0.0765  
C 0.1241 5.6816 -0.8815  
H 0.2555 6.7372 -0.6571  
C 0.5904 5.1642 -2.0568  
H 1.0946 5.8087 -2.7729  
C 0.4222 3.7759 -2.3825  
C 0.8056 3.2144 -3.6092  
H 1.2704 3.8469 -4.3614  
C 0.5262 1.8476 -3.9105  
H 0.7720 1.4595 -4.8944  
C -0.0691 1.0301 -2.9780  
H -0.2984 0.0010 -3.2397  
C -0.3733 1.4985 -1.6466  
C -0.2191 2.9436 -1.4309  
C -0.7037 3.4791 -0.2437  
C 4.8932 0.2587 -0.1558  
H 5.7466 -0.2765 0.3174  
H 4.9045 1.3217 0.1739  
H 4.4111 -2.7007 0.3166  
H 3.5246 -2.3607 -1.2270  
H 4.2832 -0.9605 2.5516  
H 2.4744 -1.0700 2.5731  
H 4.9950 0.1961 -1.2624  
H 3.2980 0.5605 2.5380  
H 2.6054 -2.8483 0.2748  
C 3.4773 -2.2789 -0.1180  
C 3.3427 -0.4934 2.1828

#### 4<sup>+</sup>, S<sub>0</sub>

Pt 3.1608212985 4.3041637359 9.1624459625  
Ag 0.4927524451 3.8245920061 8.8497682806  
S -1.5106942777 2.6440757033 9.7330328891  
F 1.95861535 5.7212732763 11.800185751  
F 2.9912304659 6.2661649615 14.2120239081  
F 5.5839503786 5.639358578 14.7776545457  
F 7.1300631192 4.4425648525 12.8829935578  
F 6.1140523043 3.8681837338 10.4653214193  
F 1.6533489046 2.4592425245 11.3868286058  
F 1.9131100669 -0.1308993838 11.972885322  
F 3.6661864526 -1.6999724385 10.5902898508  
F 5.1549068353 -0.606922723 8.584896595  
F 4.9055895718 1.9811174651 7.963184811  
N 3.0860695632 6.3024078835 8.5079923711  
O -1.1515316647 5.7081699846 8.1689422384  
C 3.987004442 4.7556570569 11.0170753585  
C 3.2493579905 5.3695757134 12.0235463246  
C 3.7528028119 5.6726349733 13.2836912166  
C 5.0725391612 5.3547984454 13.577129382  
C 5.8567802653 4.7437453629 12.606341105  
C 5.3020592048 4.4601624897 11.3625215599  
C 3.267386795 2.3563311609 9.6397304451  
C 2.5415040669 1.7455341713 10.6610795782  
C 2.6568236608 0.3996751643 10.9927169088  
C 3.5435090616 -0.4044101097 10.2901129975  
C 4.2967070747 0.1573698302 9.2673333903  
C 4.1456759071 1.5063512313 8.9634771134  
C 3.4909593012 7.3804220092 9.1705759778  
H 3.8620073336 7.2111187326 10.1756724442  
C 3.4517695864 8.6660403757 8.6125259645  
H 3.7973528607 9.5090756618 9.2012837118  
C 2.9879983732 8.8293120184 7.3220225943  
H 2.9582215006 9.8137665556 6.8612105456  
C 2.5632273606 7.7031875496 6.5921072424  
C 2.0921457841 7.7531897522 5.2395184137  
H 2.0436503086 8.717848451 4.7409309171  
C 1.7317004655 6.6139256123 4.5832364437  
H 1.3910399883 6.6659644879 3.5518125048  
C 1.7992774667 5.3285040512 5.2165356504  
C 1.4560951361 4.128638341 4.5576919265  
H 1.1193046278 4.1605005906 3.5245955056  
C 1.5636241985 2.9252653489 5.2274054244  
H 1.3149302745 2.000787179 4.7115091867  
C 1.9985232692 2.8694411981 6.5690609131  
H 2.0935651064 1.8952957474 7.0435772147  
C 2.3468189116 4.022183513 7.2819723048  
C 2.2371582194 5.2484264165 6.5582670903  
C 2.6280426559 6.4449917137 7.2311763191  
C -1.0549456057 0.8607982518 9.8458685689  
H -0.0056278846 0.7497993283 9.5660680765  
H -1.172767614 0.5417270774 10.883203858  
C -1.9835794235 0.1312204966 8.8782068165  
H -1.5512078017 -0.8320223261 8.5882614072  
H -2.9453415428 -0.0711866121 9.3649685476  
C -2.198767696 1.0556511693 7.6824573711  
H -2.9775890827 0.6838291416 7.0078026085  
H -1.2707528309 1.1492795314 7.1052035342  
C -2.5844951425 2.410979646 8.2603147697  
H -3.6244231115 2.4177045293 8.6008852994  
H -2.4290134906 3.2500176004 7.5794860578  
C -1.2209739992 6.8621099402 8.5671499779  
C -0.3365881583 7.3842673128 9.6620188778  
H 0.1961319296 6.5750354825 10.1642702101  
H -0.9166070509 7.9607992561 10.3903431362

H 0.3980358416 8.073528451 9.2263949726  
C -2.2116525048 7.8218503642 7.9648476412  
H -2.6673992363 7.3891136228 7.073355728  
H -1.7305390191 8.7747647518 7.7206239507  
H -2.993930561 8.0419020285 8.701378807

#### 4', T<sub>1</sub>

Pt 0.6814545923 -0.2802239264 -0.0357341914  
Ag -2.075243675 0.2721639169 -0.2303596499  
S -3.471518999 1.8315666511 -1.5881123633  
F 2.6020122957 0.940190042 -2.3120709101  
F 5.2517410577 0.7230755983 -2.7225573208  
F 6.7870183004 -0.7487911213 -1.0221189171  
F 5.6389899247 -2.0093089809 1.096381535  
F 2.9947459054 -1.8115322933 1.5243466797  
F -0.145882678 2.3756654676 -1.6736198659  
F 0.1789215928 4.9710403794 -1.1314551986  
F 1.4001632562 5.761365391 1.1728364888  
F 2.292544964 3.8899056785 2.9391784063  
F 1.973730862 1.2823901204 2.4271139634  
N 0.4197639212 -2.3069187887 -0.4238880114  
O -3.8275579904 -1.5104432028 -0.8959951355  
C 2.6951092776 -0.4274053862 -0.3769210021  
C 3.3213371439 0.2069675747 -1.4434456813  
C 4.6885606824 0.1083238039 -1.6788194128  
C 5.4744407848 -0.6429111877 -0.8144794904  
C 4.8836232471 -1.2865816774 0.2663067758  
C 3.5124725992 -1.1707779637 0.4678595607  
C 0.8921500296 1.6958159861 0.356657317  
C 0.4674948849 2.6968915083 -0.5162263088  
C 0.6253168984 4.054638994 -0.2636253711  
C 1.2442873788 4.463586269 0.9102417194  
C 1.6951721769 3.5045592262 1.8090668501  
C 1.5152117663 2.1565735604 1.5185089471  
C 1.0647725452 -3.0838632707 -1.3252057188  
H 1.7460725152 -2.5693508138 -1.9954318284  
C 0.869414845 -4.4495046818 -1.4104346499  
H 1.4177614929 -5.0101811762 -2.1601327773  
C -0.030766084 -5.0961133518 -0.5380076086  
H -0.1871850682 -6.1695423916 -0.5884952924  
C -0.6978363384 -4.3240875716 0.424306286  
C -1.6260258725 -4.8403795999 1.3926797748  
H -1.8272807236 -5.9093394244 1.3891769035  
C -2.2352954721 -4.0341796899 2.3139037117  
H -2.9201988477 -4.4608427724 3.0430875726  
C -1.9676015457 -2.6288495222 2.3584514248  
C -2.4929491023 -1.7583066877 3.3256076599  
H -3.1600201234 -2.155858772 4.0873410061  
C -2.1461598812 -0.4024121231 3.3471974627  
H -2.5358138394 0.2426183963 4.1291122974  
C -1.2760043673 0.1270437655 2.3859197624  
H -0.9879805702 1.173525122 2.4445830917  
C -0.7420162328 -0.6875363314 1.3593509232  
C -1.0613343898 -2.1011820125 1.3986973471  
C -0.4414343193 -2.9312905226 0.4619642422  
C -3.2825183785 3.5183780937 -0.8693814857  
H -2.600777775 3.4652118285 -0.0180666006  
H -2.8406966352 4.1660446955 -1.6288950122  
C -4.6855191387 3.9447775017 -0.4463881645  
H -4.633079212 4.7434382286 0.3008390956  
H -5.2327040397 4.3372487356 -1.3120166466  
C -5.3879442778 2.6975151248 0.0843984255  
H -6.454321033 2.8696398453 0.2657509491  
H -4.9344583791 2.3849076012 1.0330581583  
C -5.1876863998 1.6138976295 -0.9677435339  
H -5.8642896577 1.7512745793 -1.816387673  
H -5.2941436263 0.5950142532 -0.5908626839  
C -3.6082036756 -2.5688465371 -1.4727422639  
C -2.484414735 -2.7244730049 -2.4542982943  
H -1.8252735166 -1.8542982876 -2.4367201679  
H -2.905161545 -2.8393516077 -3.4611891962



H -1.9057747504 -3.6305609685 -2.2424361396  
C -4.4667001429 -3.7746562876 -1.2120932353  
H -5.388464882 -3.4852443235 -0.7054377072  
H -3.9035055015 -4.4549876612 -0.5609604609  
H -4.6870475189 -4.3182716463 -2.1358483664

**Table S11.** Energetic Results<sup>a</sup>

| Energetic Parameter (Hartree)               | <b>1, S<sub>0</sub></b> | <b>1, T<sub>1</sub></b> | <b>2, S<sub>0</sub></b> | <b>2, T<sub>1</sub></b> | <b>3, S<sub>0</sub></b> | <b>4', S<sub>0</sub></b> | <b>4', T<sub>1</sub></b> |
|---------------------------------------------|-------------------------|-------------------------|-------------------------|-------------------------|-------------------------|--------------------------|--------------------------|
| Zero-point correction                       | 0.272937                | 0.268085                | 0.274813                | 0.273562                | 0.551817                | 0.475809                 | 0.473080                 |
| Thermal correction to Energy                | 0.303661                | 0.299449                | 0.307737                | 0.306912                | 0.602637                | 0.523066                 | 0.520496                 |
| Thermal correction to Enthalpy              | 0.304605                | 0.300394                | 0.308681                | 0.307857                | 0.603582                | 0.524011                 | 0.521440                 |
| Thermal correction to Gibbs Free Energy     | 0.208318                | 0.201658                | 0.205785                | 0.20326                 | 0.457053                | 0.385456                 | 0.382121                 |
| Sum of electronic and zero-point Energies   | -2127.802901            | -2127.718810            | -2274.700953            | -2274.626621            | -3309.845605            | -3022.595063             | -3022.509020             |
| Sum of electronic and thermal Energies      | -2127.772178            | -2127.687446            | -2274.668029            | -2274.593271            | -3309.794785            | -3022.547806             | -3022.461604             |
| Sum of electronic and thermal Enthalpies    | -2127.771233            | -2127.686502            | -2274.667085            | -2274.592327            | -3309.793841            | -3022.546862             | -3022.460660             |
| Sum of electronic and thermal Free Energies | -2127.867520            | -2127.785237            | -2274.769981            | -2274.696924            | -3309.940369            | -3022.685416             | -3022.599979             |

<sup>a</sup> Frequencies calculation for the T<sub>1</sub> state of **3** has not been completed due to its very large size.
